# Supplementary material
Source: Springer Nature journal article supplement (https://www.springermedizin.de/resource/supplementary/12981_2010_186_MOESM1_ESM.pdf/9604006)

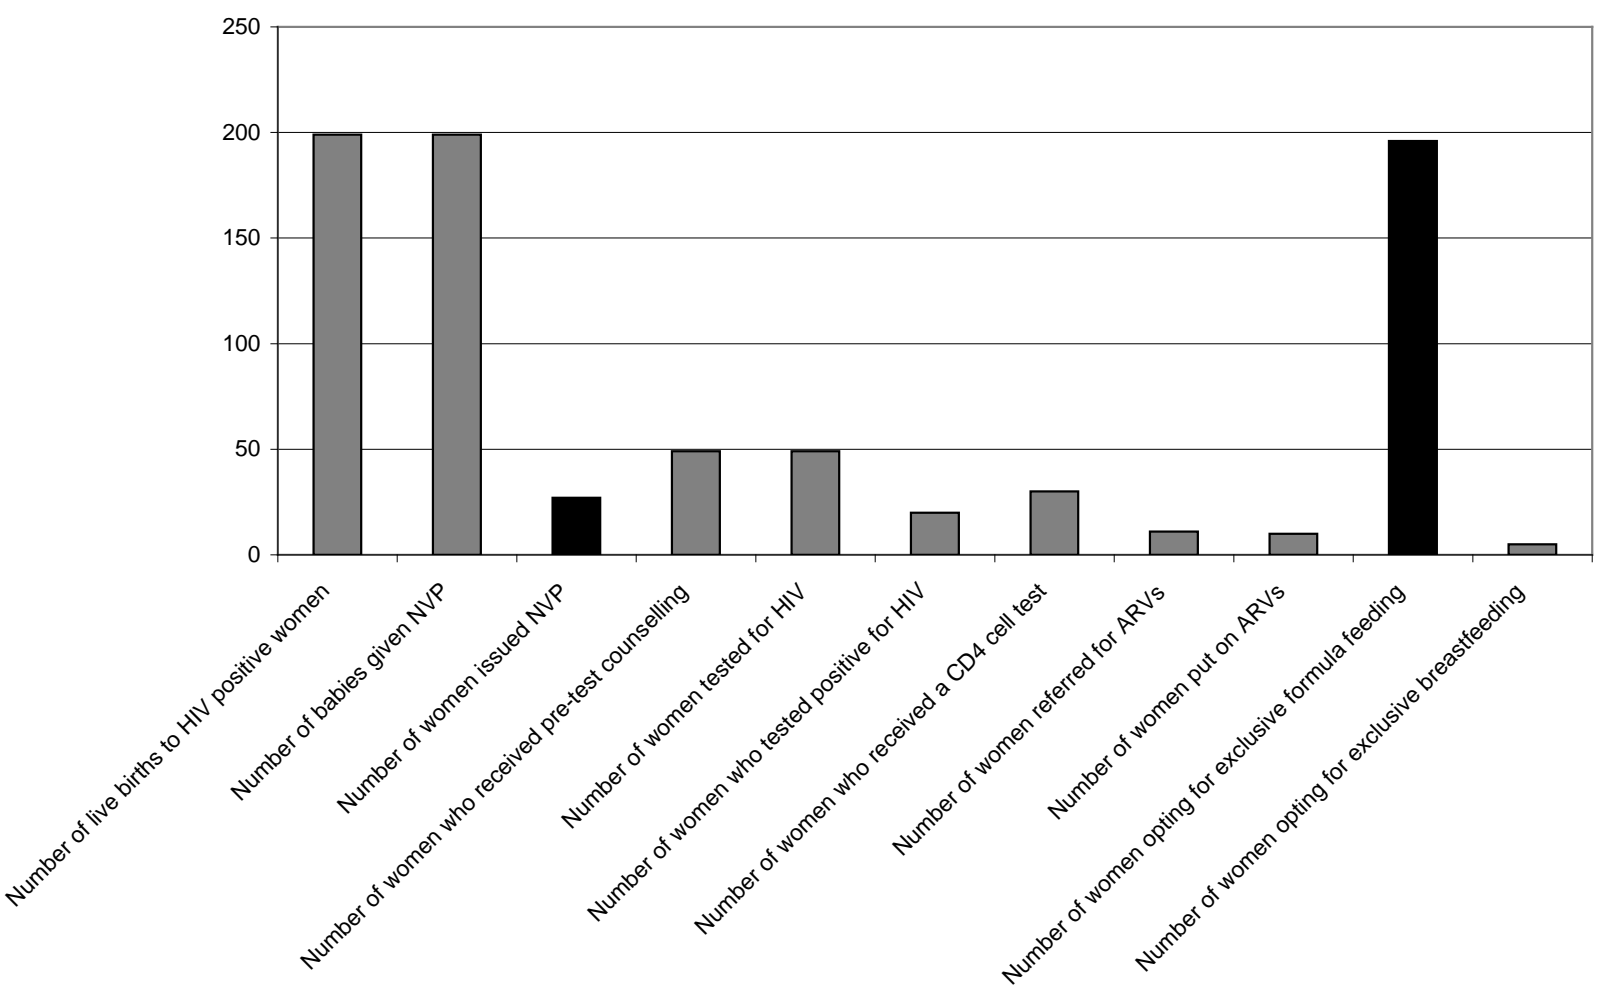

Supplement: MOESM1 [file 9604006]
